# Supplementary material for: Prevalence and Time Trends of Low Serum B12 Levels and Inadequate B12 Dietary Intake in Lebanese Adults amidst the Food Insecurity Situation: Findings from a Nationally Representative Cross-Sectional Study
Source: MDPI journal article supplement (doi:10.3390/nu16020226), 2024-01-10
Supplement: s1 [file s1]

**Table S1.** Dietary intake of food groups obtained from the food frequency questionnaire and the mean of 2 non-consecutive 24h recall in the overall population, by sex, and by age groups.

| Food groups                             | Dietary intake (g/day) |       |              |       |                |       |                | Dietary intake (g/day) |       |                 |       |                 |       |                |
|-----------------------------------------|------------------------|-------|--------------|-------|----------------|-------|----------------|------------------------|-------|-----------------|-------|-----------------|-------|----------------|
|                                         | Overall (n=444)        |       | Male (n=183) |       | Female (n=261) |       | <i>p-value</i> | 18-24 y (n=149)        |       | 25-39 y (n=151) |       | 40-64 y (n=144) |       | <i>p-value</i> |
|                                         | Mean                   | SD    | Mean         | SD    | Mean           | SD    |                | Mean                   | SD    | Mean            | SD    | Mean            | SD    |                |
| Cereals and cereal based products       | 317.2                  | 134.9 | 390.6        | 140.0 | 265.7          | 104.0 | 0.000*         | 338.8                  | 142.9 | 307.5           | 130.5 | 304.9           | 128.9 | 0.055          |
| Fruit and fruit products                | 254.3                  | 285.0 | 275.9        | 286.7 | 239.2          | 283.3 | 0.182          | 255.8                  | 272.9 | 215.7           | 210.2 | 293.4           | 353.6 | 0.064          |
| Vegetables and vegetable products       | 206.5                  | 117.8 | 197.8        | 115.4 | 212.6          | 119.3 | 0.191          | 217.4                  | 120.2 | 189.2           | 118.5 | 213.3           | 113.1 | 0.081          |
| Milk and dairy products                 | 184.5                  | 164.7 | 208.3        | 186.1 | 167.8          | 145.9 | 0.011*         | 190.3                  | 180.4 | 191.1           | 159.6 | 171.6           | 153.0 | 0.521          |
| Meat and meat products                  | 69.5                   | 75.1  | 94.1         | 98.5  | 52.2           | 45.8  | 0.000*         | 74.6                   | 57.3  | 77.3            | 82.2  | 56.0            | 81.9  | 0.030*         |
| Legumes and pulses                      | 66.9                   | 54.8  | 68.2         | 62.2  | 65.9           | 49.0  | 0.675          | 64.8                   | 61.0  | 60.5            | 46.6  | 75.7            | 55.2  | 0.049*         |
| Desserts and snack                      | 65.4                   | 114.1 | 77.7         | 159.2 | 56.7           | 65.2  | 0.092          | 100.1                  | 176.0 | 59.2            | 61.1  | 35.9            | 46.4  | <0.001*        |
| Starchy roots and tubers                | 50.5                   | 43.5  | 54.3         | 42.4  | 47.8           | 44.1  | 0.118          | 55.2                   | 49.0  | 48.8            | 38.4  | 47.3            | 42.3  | 0.248          |
| Herbs, spices and condiments            | 47.9                   | 44.1  | 50.1         | 46.1  | 46.3           | 42.7  | 0.373          | 48.4                   | 46.6  | 45.7            | 41.6  | 49.6            | 44.2  | 0.735          |
| Traditional food                        | 33.6                   | 35.5  | 38.3         | 39.4  | 30.2           | 32.2  | 0.018*         | 40.6                   | 45.7  | 30.5            | 29.2  | 29.5            | 27.8  | 0.012*         |
| Eggs and egg products                   | 22.2                   | 32.6  | 32.4         | 44.3  | 15.1           | 17.8  | 0.000*         | 26.3                   | 32.6  | 20.5            | 33.4  | 19.8            | 31.5  | 0.165          |
| Sugar and confectionery                 | 19.0                   | 22.2  | 20.5         | 23.8  | 17.9           | 20.9  | 0.235          | 21.0                   | 24.8  | 17.6            | 19.8  | 18.3            | 21.6  | 0.365          |
| Fat and oils of animals and vegetables  | 11.5                   | 11.7  | 12.2         | 13.8  | 11.0           | 10.0  | 0.289          | 10.6                   | 10.1  | 10.1            | 9.4   | 14.0            | 14.6  | 0.009*         |
| Fish and other seafood                  | 11.4                   | 21.0  | 16.9         | 28.2  | 7.6            | 12.6  | 0.000*         | 13.1                   | 26.9  | 12.1            | 18.7  | 8.9             | 15.6  | 0.206          |
| Nuts and oilseeds                       | 5.0                    | 12.5  | 6.5          | 13.1  | 4.0            | 11.9  | 0.043*         | 6.5                    | 18.1  | 4.3             | 8.6   | 4.2             | 7.8   | 0.213          |
| Drinking water <sup>a</sup>             | 1440.5                 | 843.2 | 1803.3       | 865.8 | 1186.1         | 727.3 | 0.000*         | 1318.8                 | 746.5 | 1470.7          | 770.0 | 1534.8          | 989.2 | 0.078          |
| Stimulant beverages <sup>a</sup>        | 546.8                  | 427.4 | 543.6        | 454.4 | 549.1          | 408.2 | 0.893          | 514.2                  | 387.0 | 548.3           | 435.1 | 579.0           | 458.3 | 0.431          |
| Non-Alcoholic beverages <sup>a</sup>    | 70.6                   | 120.9 | 97.0         | 160.6 | 52.1           | 77.7  | 0.001*         | 86.1                   | 143.7 | 75.3            | 120.8 | 49.7            | 89.1  | 0.031*         |
| Fruit and vegetable juices <sup>a</sup> | 66.3                   | 96.1  | 77.7         | 108.9 | 58.2           | 85.3  | 0.035*         | 93.2                   | 123.5 | 67.1            | 88.5  | 37.5            | 54.8  | <0.001*        |
| Alcoholic beverages <sup>a</sup>        | 0.6                    | 5.9   | 1.5          | 9.1   | 0.0            | 0.0   | 0.031*         | 0.1                    | 0.6   | 1.1             | 8.3   | 0.6             | 5.8   | 0.283          |

\* Significant at p-value < 0.05

<sup>a</sup> Beverages are presented in mL/day

**Table S2. Percentage of contribution of food groups to daily vitamin B12 intake in the overall population and by household FI.**

| Food groups <sup>a</sup>          | Contribution to daily vitamin B12 intake (%) |      |             |      |               |      | <i>p-value</i> |
|-----------------------------------|----------------------------------------------|------|-------------|------|---------------|------|----------------|
|                                   | Overall                                      |      | Food secure |      | Food insecure |      |                |
|                                   | Mean                                         | SD   | Mean        | SD   | Mean          | SD   |                |
| Milk and dairy products           | 33.45                                        | 19.8 | 33.02       | 18.4 | 33.93         | 21.3 | 0.633          |
| Meat and meat products            | 25.21                                        | 16.5 | 27.35       | 15.9 | 22.82         | 16.8 | 0.004*         |
| Traditional food                  | 11.99                                        | 13.9 | 9.69        | 9.3  | 14.55         | 17.3 | <0.001*        |
| Fish and other seafood            | 9.73                                         | 11.5 | 9.40        | 9.8  | 10.09         | 13.2 | 0.535          |
| Eggs and egg products             | 7.69                                         | 8.2  | 7.98        | 8.2  | 7.37          | 8.3  | 0.442          |
| Desserts and snack                | 4.97                                         | 5.3  | 5.46        | 4.8  | 4.43          | 5.8  | 0.041*         |
| Cereals and cereal based products | 3.12                                         | 4.0  | 3.50        | 4.0  | 2.69          | 4.0  | 0.033*         |
| Starchy roots and tubers          | 2.04                                         | 5.8  | 1.18        | 2.6  | 2.99          | 7.8  | 0.002*         |
| Stimulant beverages               | 1.74                                         | 6.3  | 2.35        | 7.8  | 1.06          | 3.9  | 0.026*         |
| Other <sup>b</sup>                | 0.07                                         | 0.1  | 0.07        | 0.1  | 0.07          | 0.1  | 0.878          |

\* Significant at  $p$ -value < 0.05

<sup>a</sup> Food groups with no contribution to vitamin B12 intake at all were not included in the table

<sup>b</sup> Includes the following food groups with respective negligible contributions: Herbs, spices and condiments (0.0618%), fat and oils of animals and vegetables (0.0071%), and alcoholic beverages (0.0019%)

**Table S3. Associations of demographic and socioeconomic characteristics of the study population with vitamin B12 intake and status.**

| Variable                 |               | Vitamin B12 intake |      |            |      | <i>p-value</i> | Vitamin B12 status |      |           |       | <i>p-value</i> |
|--------------------------|---------------|--------------------|------|------------|------|----------------|--------------------|------|-----------|-------|----------------|
|                          |               | Adequate           |      | Inadequate |      |                | Normal             |      | Deficient |       |                |
|                          |               | N                  | %    | N          | %    |                | N                  | %    | N         | %     |                |
| Sex                      | Male          | 117                | 63.9 | 66         | 36.1 | 0.000*         | 71                 | 38.8 | 112       | 61.2  | 1.000          |
|                          | Female        | 94                 | 36.0 | 167        | 64.0 |                | 102                | 39.1 | 159       | 60.9  |                |
| Age categories           | 18-24 y       | 80                 | 53.7 | 69         | 46.3 | 0.092          | 53                 | 35.6 | 96        | 64.4  | 0.544          |
|                          | 25-39 y       | 72                 | 47.7 | 79         | 52.3 |                | 60                 | 39.7 | 91        | 60.3  |                |
|                          | 40-64 y       | 59                 | 41.0 | 85         | 59.0 |                | 60                 | 41.7 | 84        | 58.3  |                |
| Residency                | Mount Lebanon | 91                 | 50.8 | 88         | 49.2 | 0.235          | 79                 | 44.1 | 100       | 55.9  | 0.007*         |
|                          | Beirut        | 12                 | 37.5 | 20         | 62.5 |                | 12                 | 37.5 | 20        | 62.5  |                |
|                          | South Lebanon | 46                 | 48.4 | 49         | 51.6 |                | 44                 | 46.3 | 51        | 53.7  |                |
|                          | North Lebanon | 36                 | 39.6 | 55         | 60.4 |                | 29                 | 31.9 | 62        | 68.1  |                |
|                          | Beqaa         | 26                 | 55.3 | 21         | 44.7 |                | 9                  | 19.1 | 38        | 80.9  |                |
| Marital status           | Single        | 109                | 54.0 | 93         | 46.0 | 0.017*         | 75                 | 37.1 | 127       | 62.9  | 0.782          |
|                          | Married       | 98                 | 43.9 | 125        | 56.1 |                | 89                 | 39.9 | 134       | 60.1  |                |
|                          | Widowed       | 1                  | 14.3 | 6          | 85.7 |                | 3                  | 42.9 | 4         | 57.1  |                |
|                          | Divorced      | 3                  | 25.0 | 9          | 75.0 |                | 6                  | 50.0 | 6         | 50.0  |                |
| Household crowding index | No crowding   | 94                 | 57.0 | 71         | 43.0 | 0.002*         | 72                 | 43.6 | 93        | 56.4  | 0.131          |
|                          | Crowding      | 117                | 41.9 | 162        | 58.1 |                | 101                | 36.2 | 178       | 63.8  |                |
| Number of children       | None          | 116                | 53.5 | 101        | 46.5 | 0.009*         | 81                 | 37.3 | 136       | 62.7  | 0.588          |
|                          | 1-3           | 73                 | 45.9 | 86         | 54.1 |                | 67                 | 42.1 | 92        | 57.9  |                |
|                          | More than 3   | 22                 | 32.4 | 46         | 67.6 |                | 25                 | 36.8 | 43        | 63.2  |                |
| Education level          | Illiterate    | 1                  | 33.3 | 2          | 66.7 | 0.000*         | 0                  | 0.0  | 3         | 100.0 | 0.468          |
|                          | School        | 61                 | 34.9 | 114        | 65.1 |                | 67                 | 38.3 | 108       | 61.7  |                |
|                          | University    | 149                | 56.0 | 117        | 44.0 |                | 106                | 39.8 | 160       | 60.2  |                |
|                          | Unemployed    | 72                 | 33.0 | 146        | 67.0 | 0.000*         | 73                 | 33.5 | 145       | 66.5  | 0.025*         |

|                                                    |                                    |     |      |     |      |        |     |      |     |      |       |
|----------------------------------------------------|------------------------------------|-----|------|-----|------|--------|-----|------|-----|------|-------|
| <b>Current occupation</b>                          | Employed                           | 139 | 61.5 | 87  | 38.5 |        | 100 | 44.2 | 126 | 55.8 |       |
| <b>Monthly salary change after economic crisis</b> | Increase or already have no salary | 91  | 47.4 | 101 | 52.6 | 1.000  | 73  | 38.0 | 119 | 62.0 | 0.768 |
|                                                    | Decline or no change               | 120 | 47.6 | 132 | 52.4 |        | 100 | 39.7 | 152 | 60.3 |       |
| <b>Household monthly income</b>                    | None                               | 14  | 35.9 | 25  | 64.1 | 0.000* | 15  | 38.5 | 24  | 61.5 | 0.121 |
|                                                    | < 1.5 million L.B.P.               | 14  | 24.1 | 44  | 75.9 |        | 14  | 24.1 | 44  | 75.9 |       |
|                                                    | ≥1.5 million L.B.P.                | 99  | 46.9 | 112 | 53.1 |        | 84  | 39.8 | 127 | 60.2 |       |
|                                                    | ≤300 USD                           | 54  | 58.7 | 38  | 41.3 |        | 39  | 42.4 | 53  | 57.6 |       |
|                                                    | >300 USD                           | 30  | 68.2 | 14  | 31.8 |        | 21  | 47.7 | 23  | 52.3 |       |

\* Significant at p-value < 0.05
